# Supplementary material for: Osteoblast differentiation of equine induced pluripotent stem cells
Source: PubMed Central journal article supplement (PMC5992527; doi:10.1242/bio.033514), 2018-04-23
Supplement: biolopen-7-033514-s1.pdf [file biolopen-7-033514-s1.pdf]

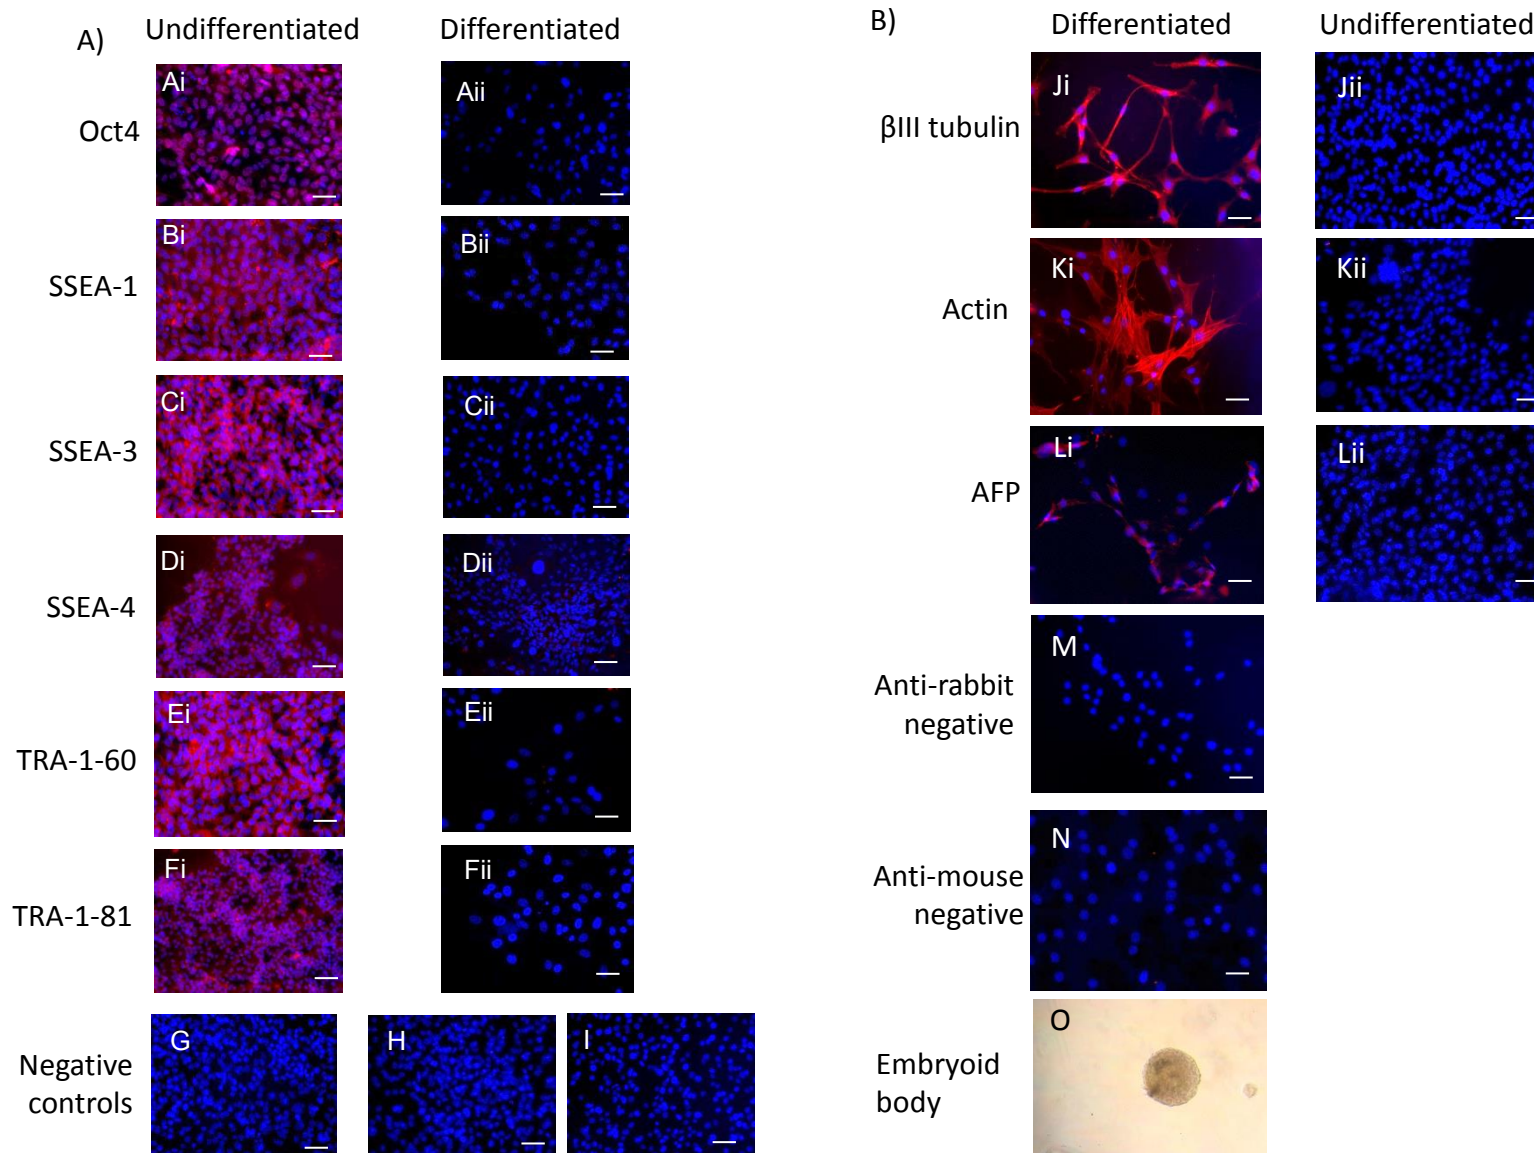

**Supplementary Figure 1A).** Undifferentiated iPSCs express pluripotency markers (Ai – Fi) and these are lost upon spontaneous differentiation (Aii – Fii). Negative controls on the undifferentiated cells for the secondary antibodies are shown in G) anti-mouse, H) anti-rabbit and I) anti-rat. **B)** iPSCs can undergo differentiation *in vitro*. After 7 days of spontaneous *in vitro* the iPSCs exhibit positive staining for  $\beta$ III tubulin, actin and alpha-fetoprotein (Ji-Li). These proteins are not produced by the undifferentiated iPSCs (Jii-Lii). Negative controls on the differentiated cells are shown in M and N. Scale bar = 40  $\mu$ m. The iPSCs can also form embryoid bodies in suspension culture over a period of 14 days (O).
